# Supplementary material
Source: PubMed Central journal article supplement (PMC3861715)
Supplement: supp_M113.030692_mcp.M113.030692-7.pdf [file supp_M113.030692_mcp.M113.030692-7.pdf]

**Supplemental Data 1. List of peaks identified by nanoLC-MS/MS for the novel 10 Cc-targets.**

1. tr|O22957|O22957\_ARATH (APOPTOSIS INHIBITORY 5)

Mass: **61948**

Score: **47**

Percentage of coverage: **1.9**

Queries matched: 1

OS=Arabidopsis thaliana

GN=**AT2G34040**

| Observed | Mr(expt)  | Precursor charge | Mr(calc)  | Delta   | Miss | Score | Expect | Rank | Peptide         |
|----------|-----------|------------------|-----------|---------|------|-------|--------|------|-----------------|
| 626.7611 | 1251.5077 | 2+               | 1251.7802 | -0.2725 | 0    | 47    | 0.0035 | 1    | R.QLLPSIVELLK.I |

2. tr|Q0WQY6|Q0WQY6\_ARATH (HYDROXYACYLGLUTATHIONE HYDROLASE)

Mass: **29173**

Score: **62**

Percentage of coverage: **8.5**

Queries matched: 1

OS=Arabidopsis thaliana

GN=**AT3G10850**

| Observed  | Mr(expt)  | Precursor charge | Mr(calc)  | Delta   | Miss | Score | Expect   | Rank | Peptide                    |
|-----------|-----------|------------------|-----------|---------|------|-------|----------|------|----------------------------|
| 1265.8704 | 2529.7262 | 2+               | 2530.2261 | -0.4999 | 0    | 62    | 8.7e-005 | 1    | R.QADLPTIPSTLEEELETNPFMR.V |

3. tr|Q0WVE7|Q0WVE7\_ARATH (GLYCERALDEHYDE-3-PHOSPHATE DEHYDROGENASE C SUBUNIT)

Mass: **37005**

Score: **100**

Percentage of coverage: **2.9**

Queries matched: 1

OS=Arabidopsis thaliana

GN=**AT3G04120**

| Observed | Mr(expt)  | Precursor charge | Mr(calc)  | Delta   | Miss | Score | Expect   | Rank | Peptide            |
|----------|-----------|------------------|-----------|---------|------|-------|----------|------|--------------------|
| 749.7512 | 1497.4878 | 2+               | 1497.8402 | -0.3525 | 0    | 100   | 1.4e-008 | 1    | R.VPTVDVSVVDLTVR.I |

4. tr|Q8LAP5|Q8LAP5\_ARATH (PUTATIVE TRANSLATION INITIATION FACTOR eIF-2, GAMMA SUBUNIT)

Mass: **51406**

Score: **45**

Percentage of coverage: **5.1**

Queries matched: 2

OS=Arabidopsis thaliana

| Observed | Mr(expt)  | Precursor charge | Mr(calc)  | Delta   | Miss | Score | Expect | Rank | Peptide          |
|----------|-----------|------------------|-----------|---------|------|-------|--------|------|------------------|
| 693.6886 | 1385.3626 | 2+               | 1385.7489 | -0.3863 | 0    | 29    | 0.15   | 1    | R.NFVSPNMIVIR.S  |
| 757.8344 | 1513.6542 | 2+               | 1513.7486 | -0.0945 | 0    | 45    | 0.0042 | 1    | K.YNIDVVCEYIVK.K |

5. tr|Q9CA59|Q9CA59\_ARATH (PUTATIVE SET PROTEIN, PHOSPHATASE 2A INHIBITOR)

Mass: **29398**

Score: **404**

Percentage of coverage: **11.7**

Queries matched: 9

OS=Arabidopsis thaliana

GN=**AT1G74560**

| Observed  | Mr(expt)  | Precursor charge | Mr(calc)  | Delta   | Miss | Score | Expect   | Rank | Peptide                 |
|-----------|-----------|------------------|-----------|---------|------|-------|----------|------|-------------------------|
| 623.6304  | 1245.2462 | 2+               | 1245.6088 | -0.3626 | 0    | 9     | 7.3      | 3    | K.ASDEVLEVEQK.Y         |
| 1079.2682 | 2156.5218 | 2+               | 2157.0688 | -0.5470 | 0    | 94    | 6.6e-008 | 1    | K.GEEENLEQIDAELVLSIEK.L |

6. tr|Q9SY09|Q9SY09\_ARATH (SMALL NUCLEAR RIBOPROTEIN Sm-D1)

Mass: **12742**

Score: **96**

Percentage of coverage: **17.2**

Queries matched: 3

OS=Arabidopsis thaliana

GN=**AT4G02840**

| Observed  | Mr(expt)  | Precursor charge | Mr(calc)  | Delta   | Miss | Score | Expect   | Rank | Peptide                   |
|-----------|-----------|------------------|-----------|---------|------|-------|----------|------|---------------------------|
| 1182.3691 | 2362.7236 | 2+               | 2363.2260 | -0.5024 | 0    | 100   | 1.7e-008 | 1    | R.YYILPDSLNLLETLLVEDTPR.V |

7. tr|Q8L773|Q8L773\_ARATH (TRANSCRIPTIONAL COACTIVATOR-LIKE PROTEIN)

Mass: **25740**

Score: **186**

Percentage of coverage: **9.4**

Queries matched: 3

OS=Arabidopsis thaliana

GN=**AT5G59950**

| Observed | Mr(expt)  | Precursor charge | Mr(calc)  | Delta   | Miss | Score | Expect   | Rank | Peptide             |
|----------|-----------|------------------|-----------|---------|------|-------|----------|------|---------------------|
| 585.2010 | 584.1937  | 1+               | 584.3030  | -0.1093 | 0    | 9     | 9        | 1    | R.GGAGPAR.G         |
| 943.7587 | 1885.5029 | 2+               | 1885.9131 | -0.4102 | 0    | 111   | 1.1e-009 | 1    | K.LYISNLDYGVNEDIK.E |

8. sp|P43297|RD21A\_ARATH (CYSTEINE PROTEINASE RD21A)

Mass: **52131**

Score: **34**

Percentage of coverage: **3.4**

Queries matched: 1

OS=Arabidopsis thaliana

GN=RD21A

| Observed | Mr(expt)  | Precursor charge | Mr(calc)  | Delta  | Miss | Score | Expect | Rank | Peptide              |
|----------|-----------|------------------|-----------|--------|------|-------|--------|------|----------------------|
| 795.6644 | 1589.3143 | 2+               | 1588.8685 | 0.4458 | 0    | 34    | 0.035  | 1    | K.AVAHQPISIAIEAGGR.A |



9. sp|Q9LKR3|BIP1\_ARATH (LUMINAL-BINDING PROTEIN 1)

Mass: **73869**

Score: **47**

Percentage of coverage: **2.1**

Queries matched: 1

OS=Arabidopsis thaliana

GN=**AT5G28540**

| Observed | Mr(expt)  | Precursor charge | Mr(calc)  | Delta   | Miss | Score | Expect | Rank | Peptide            |
|----------|-----------|------------------|-----------|---------|------|-------|--------|------|--------------------|
| 737.3730 | 1472.7315 | 2+               | 1472.7834 | -0.0520 | 0    | 47    | 0.0027 | 1    | K.SQIDEIVLVGGSTR.I |

10. sp|Q39043|BIP2\_ARATH (LUMINAL-BINDING PROTEIN 2)

Mass: **73801**

Score: **47**

Percentage of coverage: **2.1**

Queries matched: 1

OS=Arabidopsis thaliana

GN=**AT5G42020**

| Observed | Mr(expt)  | Precursor charge | Mr(calc)  | Delta   | Miss | Score | Expect | Rank | Peptide            |
|----------|-----------|------------------|-----------|---------|------|-------|--------|------|--------------------|
| 737.3730 | 1472.7315 | 2+               | 1472.7834 | -0.0520 | 0    | 47    | 0.0027 | 1    | K.SQIDEIVLVGGSTR.I |
