# Supplementary material
Source: PubMed Central journal article supplement (PMC3861715)
Supplement: supp_M113.030692_mcp.M113.030692-8.pdf [file supp_M113.030692_mcp.M113.030692-8.pdf]

| <b>Cc-Protein Partner</b>                                 | <b><math>k_{\text{on}} \times 10^3</math><br/>(<math>\text{M}^{-1} \text{s}^{-1}</math>)</b> | <b><math>k_{\text{off}} \times 10^{-4}</math><br/>(<math>\text{s}^{-1}</math>)</b> | <b><math>K_{\text{D}} \times 10^{-8}</math><br/>(<math>\text{M}</math>)</b> |
|-----------------------------------------------------------|----------------------------------------------------------------------------------------------|------------------------------------------------------------------------------------|-----------------------------------------------------------------------------|
| Hydroxyacylglutathione<br>hydrolase (GLY2)                | $6.81 \pm 1.10$                                                                              | $15.00 \pm 0.49$                                                                   | $22.22 \pm 2.05$                                                            |
| Nucleosome assembly protein<br>1-related protein 1 (NRP1) | $7.32 \pm 1.01$                                                                              | $5.34 \pm 0.66$                                                                    | $7.30 \pm 0.48$                                                             |
| Transcriptional coactivator-like<br>(TCL)                 | $14.80 \pm 4.90$                                                                             | $3.20 \pm 0.65$                                                                    | $2.16 \pm 0.58$                                                             |
